# Supplementary material for: Genome-wide association studies of global Mycobacterium tuberculosis resistance to 13 antimicrobials in 10,228 genomes identify new resistance mechanisms
Source: PubMed Central journal article supplement (PMC9363015; doi:10.1371/journal.pbio.3001755), 2022-08-09
Supplement: pbio.3001755.s004.pdf [file pbio.3001755.s004.pdf]

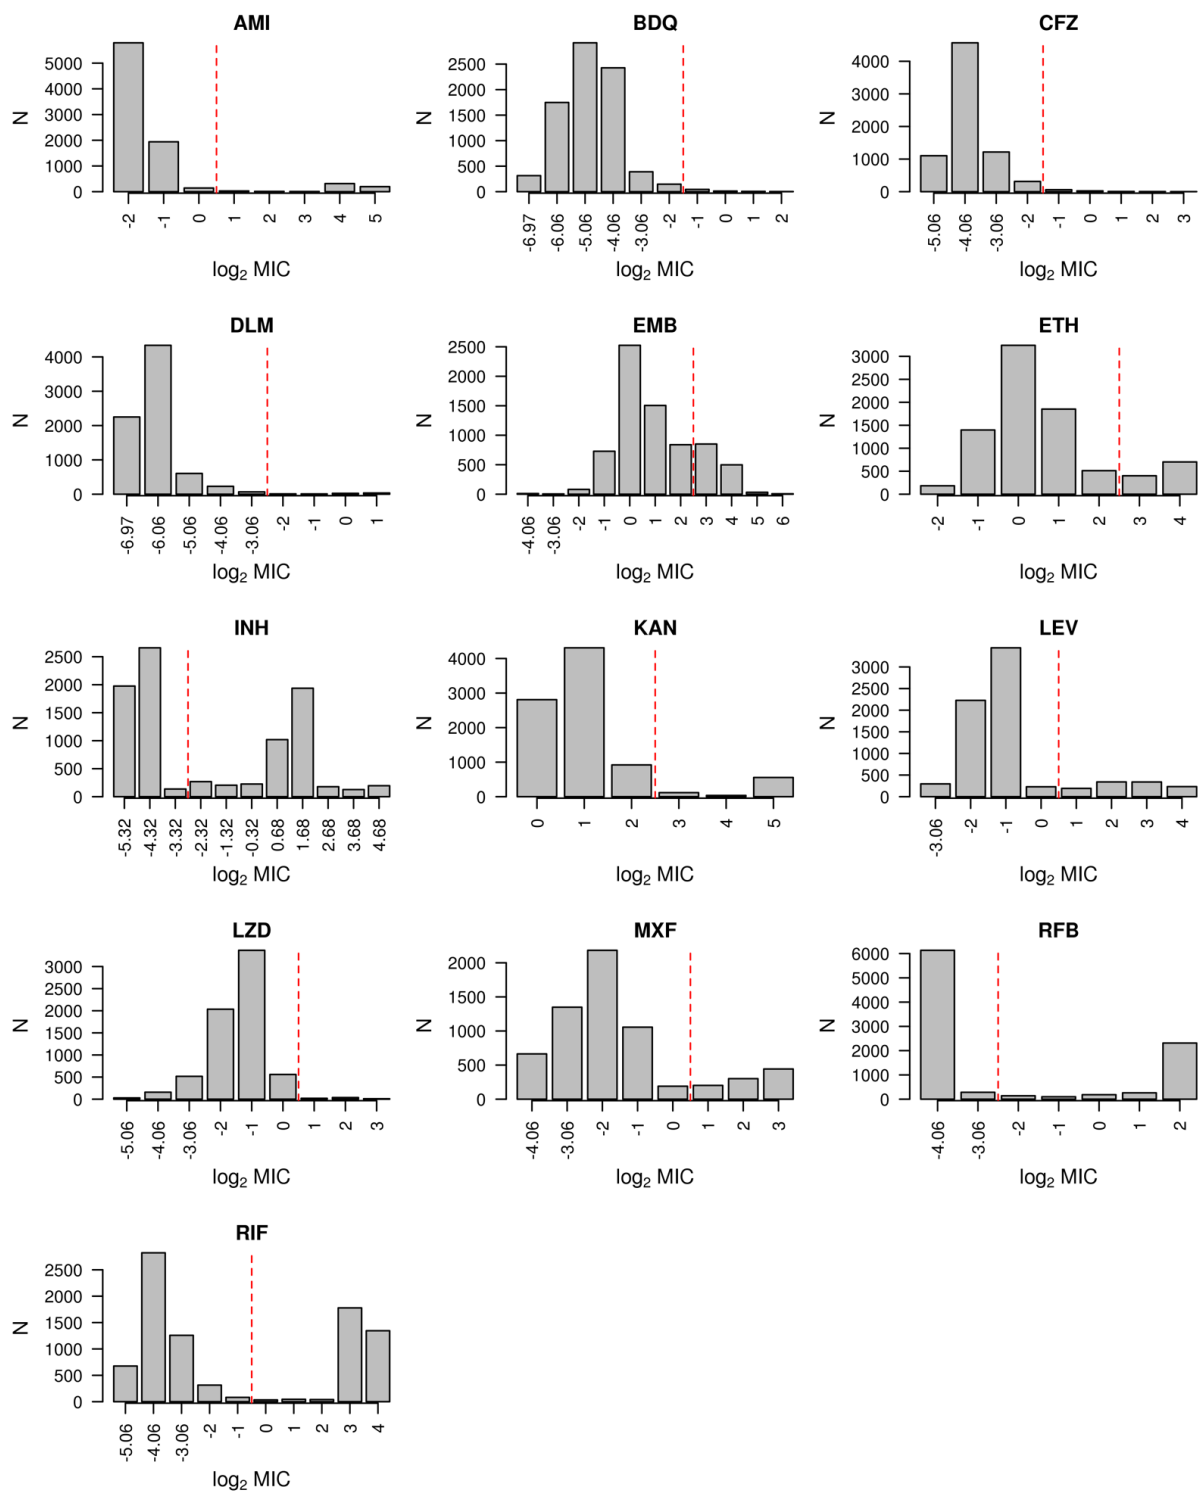

**S1 Fig.** Distributions of the log<sub>2</sub> MIC measurements for all 13 drugs in the GWAS analyses, amikacin (AMI), bedaquiline (BDQ), clofazimine (CFZ), delamanid (DLM), ethambutol (EMB), ethionamide (ETH), isoniazid (INH), kanamycin (KAN), levofloxacin (LEV), linezolid (LZD), moxifloxacin (MXF), rifabutin (RFB) and rifampicin (RIF). The red dashed line indicates the ECOFF, measurements to the left of the ECOFF are considered sensitive, those to the right are considered resistant.
