# Supplementary material for: Genome-wide association studies of global Mycobacterium tuberculosis resistance to 13 antimicrobials in 10,228 genomes identify new resistance mechanisms
Source: PubMed Central journal article supplement (PMC9363015; doi:10.1371/journal.pbio.3001755), 2022-08-09
Supplement: pbio.3001755.s005.pdf [file pbio.3001755.s005.pdf]

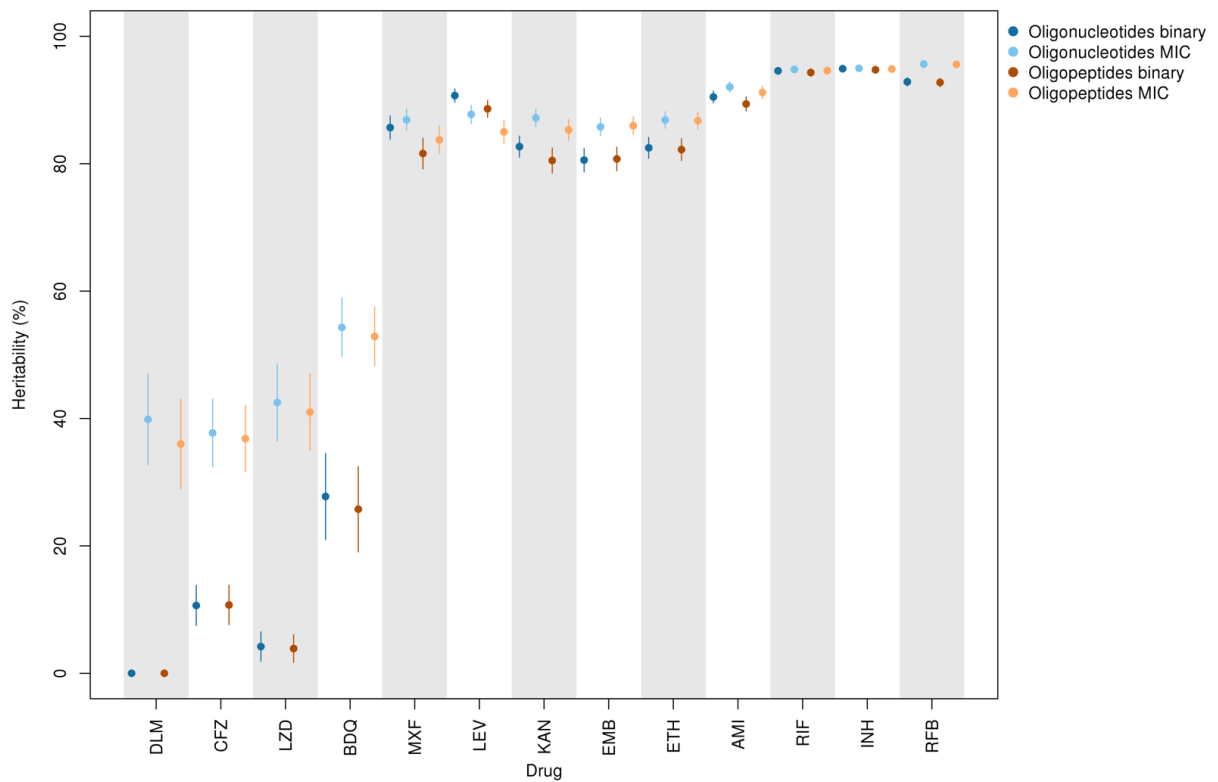

**S2 Fig.** Oligopeptide and oligonucleotide sample heritability estimates for binary resistant vs. sensitive phenotypes compared to semi-quantitative MIC phenotypes. Sample heritability estimates and 95% confidence intervals are shown for the 13 drugs, DLM (delamanid), clofazimine (CFZ), linezolid (LZD), bedaquiline (BDQ), moxifloxacin (MXF), levofloxacin (LEV), kanamycin (KAN), ethambutol (EMB), ethionamide (ETH), amikacin (AM), rifampicin (RIF), isoniazid (INH), rifabutin (RFB). When estimating heritability of the same phenotype, the oligopeptide and oligonucleotide estimates are very similar.
