# Supplementary material for: Genome-wide association studies of global Mycobacterium tuberculosis resistance to 13 antimicrobials in 10,228 genomes identify new resistance mechanisms
Source: PubMed Central journal article supplement (PMC9363015; doi:10.1371/journal.pbio.3001755), 2022-08-09
Supplement: pbio.3001755.s007.pdf [file pbio.3001755.s007.pdf]

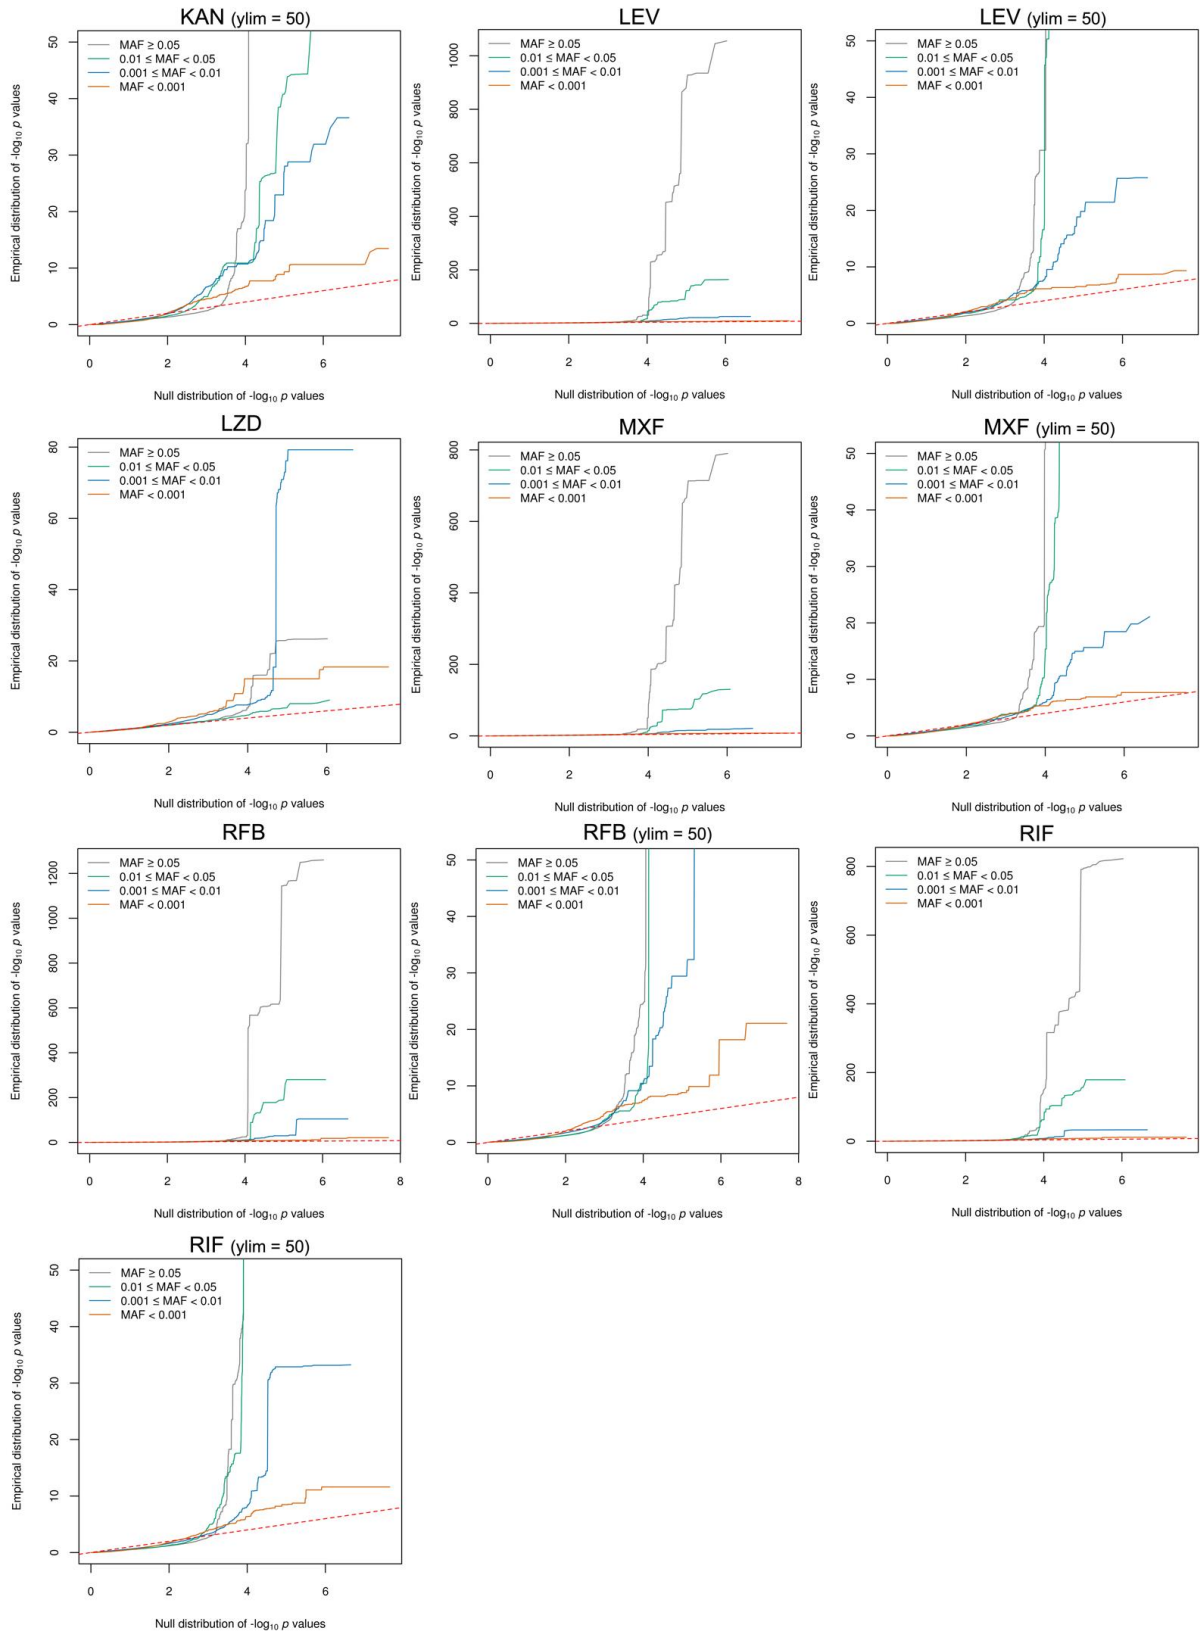

**S4 Fig. QQ plots for the oligopeptide analyses, part B.** Comparing the empirical distribution of p-values to the

expected distribution under the null hypothesis for the kanamycin (KAN), levofloxacin (LEV), linezolid (LZD), moxifloxacin (MXF), rifabutin (RFB) and rifampicin (RIF). Oligopeptides in the orange (MAF < 0.1%) were not initially analysed, only used for signal interpretation.
