# Supplementary material for: Genome-wide association studies of global Mycobacterium tuberculosis resistance to 13 antimicrobials in 10,228 genomes identify new resistance mechanisms
Source: PubMed Central journal article supplement (PMC9363015; doi:10.1371/journal.pbio.3001755), 2022-08-09
Supplement: pbio.3001755.s020.pdf [file pbio.3001755.s020.pdf]

**Heritability estimates and 95% confidence intervals**

|                     | <b>Oligopeptides MIC</b> | <b>Oligopeptides binary</b> | <b>Oligonucleotides MIC</b> | <b>Oligonucleotides binary</b> |
|---------------------|--------------------------|-----------------------------|-----------------------------|--------------------------------|
| <b>Delamanid</b>    | 36.0 (28.94-43.05)       | 0 (-0.49-0.49)              | 39.86 (32.69-47.02)         | 0 (-0.45-0.45)                 |
| <b>Clofazimine</b>  | 36.83 (31.62-42.04)      | 10.72 (7.61-13.83)          | 37.73 (32.41-43.05)         | 10.64 (7.49-13.8)              |
| <b>Linezolid</b>    | 41 (34.98-47.01)         | 3.88 (1.7-6.06)             | 42.51 (36.44-48.58)         | 4.19 (1.87-6.51)               |
| <b>Bedaquiline</b>  | 52.88 (48.26-57.5)       | 25.76 (19.04-32.47)         | 54.29 (49.71-58.86)         | 27.75 (20.99-34.52)            |
| <b>Moxifloxacin</b> | 83.74 (81.6-85.88)       | 81.6 (79.2-84.01)           | 86.88 (85.21-88.56)         | 85.67 (83.85-87.5)             |
| <b>Levofloxacin</b> | 85 (83.18-86.81)         | 88.61 (87.27-89.95)         | 87.75 (86.34-89.17)         | 90.69 (89.66-91.73)            |
| <b>Kanamycin</b>    | 85.3 (83.68-86.92)       | 80.5 (78.53-82.47)          | 87.19 (85.85-88.53)         | 82.68 (81.01-84.35)            |
| <b>Ethambutol</b>   | 85.97 (84.57-87.36)      | 80.74 (78.88-82.61)         | 85.78 (84.39-87.17)         | 80.56 (78.71-82.41)            |
| <b>Ethionamide</b>  | 86.74 (85.41-88.08)      | 82.21 (80.49-83.94)         | 86.86 (85.57-88.15)         | 82.49 (80.85-84.13)            |
| <b>Amikacin</b>     | 91.18 (90.21-92.15)      | 89.38 (88.26-90.49)         | 92.05 (91.23-92.86)         | 90.47 (89.54-91.41)            |
| <b>Rifampicin</b>   | 94.6 (94.03-95.17)       | 94.31 (93.71-94.91)         | 94.8 (94.27-95.34)          | 94.57 (94.01-95.14)            |
| <b>Isoniazid</b>    | 94.87 (94.37-95.38)      | 94.74 (94.2-95.29)          | 94.97 (94.47-95.48)         | 94.91 (94.37-95.45)            |
| <b>Rifabutin</b>    | 95.6 (95.13-96.07)       | 92.75 (92.09-93.41)         | 95.65 (95.19-96.1)          | 92.86 (92.22-93.5)             |

**S1 Table.** Oligopeptide and oligonucleotide sample heritability estimates for binary resistant vs. sensitive phenotypes compared to semi-quantitative MIC phenotypes. Sample heritability estimates and 95% confidence intervals are shown for the 13 drugs.
